# Supplementary material for: Genome-Wide Analysis of the SAUR Gene Family and Its Expression Profiles in Response to Salt Stress in Santalum album
Source: MDPI journal article supplement (doi:10.3390/plants13101286), 2024-05-07
Supplement: s1 [file s1]

### Supplementary S1. The protein sequences of 43 SAUR genes in *Santalum album*

>SA01G02339.t1 gene=SA01G02339 SaSAUR01

MAIRKPNRVCQTECLKQILKRCSSFGKKHGYASIEDGPPGDVPGKHFAVYVGENRSRYIV  
PISWLAHPEFQSLRRRAEEEFGFDHGMGITIPCEEVAFLSLATMIAAGNRTRVCTVAGYYS  
TTRPLASPRLCVPKSQTEGENPMNNDALFVPLILSFILLIYFMAGRALCIRIPDRMPEPSKD  
RSIHPSQTAVFALGSFWRSEAAFGCLDGVVRTTSGYAGGSKINPQYRSLGEHAESVQIEY  
DPGVISFKQLLEVFWSHDPTQVFGPGPDVSNQYRSIIFTNGTEESRLAAVSKERQQTKSR  
KSILTQIQQLEMFYSAEPEHQKFELKRSPFMLQLIGNLPQEELEKSNLAAKLNKYAAELC  
PAKIQMQIDTKISDIIGKGWPILREIFDFALFKIGFCSSPAGKLAILKRAQAGRAPKPYEAFK  
ALKLIP

>SA02G00132.t1 gene=SA02G00132 SaSAUR02

MRTLNGFKLMKRVRTLYRKTRHFSRIHSWGHRLKSALRSGRSFLQDSVSGSSRRYVVISG  
AAAVEEKPQKQTPVPGHLAVYVGGDLKRVLVPVMYFNHPLFGELLREAEKEYGFYHPGG  
TIPCRVSEFERVQTSIAAVHGGQHFAGSRCLL

>SA02G00206.t1 gene=SA02G00206 SaSAUR03

MGYGESGVESNKLRGVPGKCLAITVGGTGEPPERLVVPVSYLNHPRFVELLKEVEEEYGF  
DHHQGTITIPCAQDFLSLRTMIHDEHSSSSLNHHHHRHHRHLRHLVGCFCGV

>SA02G00516.t1 gene=SA02G00516 SaSAUR04

MALRKSSKALPQAALLKQILKRCSSLKKRHGSGGGDDLPLDIPKGFHAVYVGENRIRHIV  
PISLLAHPQFQGLLHRAEEEFGFDHEMGLTIPCKEDLFRSLTSTLAG

>SA02G00677.t1 gene=SA02G00677 SaSAUR05

MDSVKKRWKLSIITRALQGFRSMAPKAKPPPPAGCFVVYVGEERFFVKTKWASHPF  
FQILLEDAESEYGYSSQGPILLPCNVHLFRRVLAAMEVSDGDEADALAAGAAFGGGLLRS  
ARSYTPLRCSPALKLNQF

>SA02G01106.t1 gene=SA02G01106 SaSAUR06

MAIRKFNRVPQTAALKQILKRCSSFGKGGADHCPDVPKGFHAVYVGENRARYIVPISW  
LAHPGFQMLLQRAEEEFGFGHGMGITIPCEEDAFQSLASMIG

>SA02G02406.t1 gene=SA02G02406 SaSAUR07

MSGERSFRSFHLHPLHHPHHHHHQHGHHYGKRQGGNRDRIRDVPKGCLAIRVGG  
KGEEPQRFVVPVAYFNHPLFLQLLKEAEEYGFDPKGTITIPCQVRDFRFVQCIIDEERSSS  
SMHLHHHDVIGCFRV

>SA02G02629.t1 gene=SA02G02629 SaSAUR08

MTKLGGFKLARRIKTLCRRIIRRIPTFRAGFHRLDPPDCRARSSSFSTVSKVCSWGHRLK  
TRAKSAICSASRPGVGLLPGPGLGAGRGYVPIGGEKKPGAVPGHGLAVYVQGNDGDFQR  
VLVPVMYFNHPLFGQLLREAEVYGFQHPGGITIPCRIFESESVQTRIAAVHGYRRILRRQ  
AL

>SA02G02667.t1 gene=SA02G02667 SaSAUR09

MEERKKKMKVKKGWLAVQVGLDEDGGGSRRFMPIGYLYHPLFQRLLERSREIYGYDTA  
GPLRLPCSRNLPLISTLVASRRLKPPRPSVSSSPKQSRFRIIAAKMATIQDDDNKIAPSPIKIF  
DSHLHVWASPQEAADKYPYFPGQEPTLPGNVDFLLQCMEEAGVDGALVVQPINHKFDHS  
LVTSLVRNYPKSFVGCCLANPAEDGSGVQQLLEHLVTKDGYRAVRFNPYLWPSGQQMTN  
EIGKAMFSKAGELRPVGVGFMCMKGLNLHISEIEKLCSEFPSTVVLLDHLAFCKQPTNEEEN  
SALSKLLKLSRFPQVYVKFSALFRVSKMPFPYKDLAPLLFQVVSTFGANRVMWGSDFPFA  
VPEGYREAKEAVSIIADQVPLSSSELEWIMGR TALQLFQGLSYPSLPSALSNEF

>SA02G03132.t1 gene=SA02G03132 SaSAUR10

MAKKMGGGIVKLKTVIEKLQRSFSGEKKAAANSAPKDVKDGHFVMAANDNEHRRFIV  
PLSYLVQPAFLGLLKDAAEVYGINQKGVLTIPC

>SA02G03133.t1 gene=SA02G03133 SaSAUR11

MAAYYIVSKDVKEGHLAVTAAEDDEQRRFIVPLSYLVKPVFLGFLEDVAEVYSFNQKGGK  
MMIPCRPCELERLLAEQSRIDKDSNDVAVKLGFIQSFDQKL RMSMEEGTA

>SA02G03134.t1 gene=SA02G03134 SaSAUR12

MAKRMGGGIVKIKVVI AKLQRSLSGKKMAANFVVPEDVKEGHFAVIAAIDDEQRRFIVPL  
SYLAQPAFLGLLEDAANVYGFDQKGALMIPCRPCELERLMAEQSRGDRDSSDVAVKWG  
SYKASIRSC

>SA03G00088.t1 gene=SA03G00088 SaSAUR13

MDGGIKEKGKRGLFNKTWERCSIGRGGAVKRASSSPPPPLRLGAKSKSWPRLPGKQQ  
KRVAPEGCFSVYVGPQKQKFVVKTEYANHPLFRMLLEEAELEYGYNSQGPLLLPCDVDL  
FYRVLMEMDCDDGDEGIGRRGGGGCAFGSPYRLLNPSRSLLMNHF

>SA03G00867.t1 gene=SA03G00867 SaSAUR14

MAIRKAKTETSSLKQILKRCSSALWGRRRRRNRNEYGPPEDVPEGHFAVYVGENRKRHV  
VPITILRRPEFQRLLRRAEEEF GFDHCMGGLTIPCEDPFFRTLTSAPLTVKSGEP

>SA04G00058.t1 gene=SA04G00058 SaSAUR15

MSAPEFGYDRKGPLSIPCEAPCIRNILQRRRIIVMRTLQSFTLTSVHNAIYGFSQLTPAPHL SV  
MGLRINSASPPR

>SA04G00729.t1 gene=SA04G00729 SaSAUR16

MRRTSQKLSDVVEKWRKGKKGCFVVYTKEGKRFVPLHYLDHPIFRVLLEMAEDEF GST  
VRGPLKVPCEERLMDYILCLLKRNP PKQWQTQSFGLLA

>SA04G00792.t1 gene=SA04G00792 SaSAUR17

MAIVGKASKVSAQTSPLKQILKRCSTLTKNSSSSNNKPGSDVPKGHFAVYVGENRARH  
IVPISFLSRPEFQRLLRQAEEEF GFDHDMGLTIPCEEVAFRALKSTLMR

>SA04G01353.t1 gene=SA04G01353 SaSAUR18

MGIGQRNPLNFHLNHHHHHHHDVYDDGGDEDGEMIPKGFVGIRVGEEHRRFVVPVAYV  
NHPLFMKLLNEAEAEYGF DREGPITIPCHIQEFQHVQGIHKDNILHHHHHHHHHHHFLCFR  
P

>SA04G02219.t1 gene=SA04G02219 SaSAUR19

MSAGFGKCSKIRHIVRLRQLLRWRNKAASSSRVASANRIPSDVPAGHVAVSVGSERRRF  
VVPATHLNHPAFRKLLAQAAEEYGFGNNAGPLAIPSCDESVFEEVLRLLISLSEPGNNPTQL  
ANLDDLQRYCHTGIRTAWYESQPLLLELAGNSIW

>SA04G02816.t1 gene=SA04G02816 SaSAUR20

MKQLIRRFSRVADSSQYCMLRSPEEPQRRRAARSAASFRAGSFRARRSAAVPGGHLPVYV  
GDEMERFVVSSELLNHPIFVNLLNKSAQEYGYEHKGAIRIPCHVIAFERLLEALRLGSDPT  
ELQDLIDDSFL

>SA04G02839.t1 gene=SA04G02839 SaSAUR21

MKKNLNSILRKCKSLSMELGRSSPYTSLRRSDSTKLLGVWGGVGRRSRRSRLADGGGDD  
DGYGEEYNETVIYVVGSKRRRYVVNPEFLSHPLLSALIEKSSSDERGEAAAAAAGNRRHIW  
VRCEVVLFDHLLWMLQSGDPGLGSGDSLEELAELYVF

>SA05G00696.t1 gene=SA05G00696 SaSAUR22

MTSGLGSCRKIRHIVRLRQMLRRWSKAVSARVSSPGRVPADVPAGYVAVSVGAGCKRF  
VVRASHLNHPVFQKLLTQAEEEYGFTTEGPLWIPCDESVFEDVLRFLSRSDSPSSAGFVDL  
EEDFQRFCHVGIMANWLESR

PLLHELTDKSIW

>SA06G00626.t1 gene=SA06G00626 SaSAUR23

MSKPSMAGAAKVDKIRQVVRLLKQVMQRWRTMSLRRHRDSDSSTTRRIPSGFLAVYVG  
ADRRRFVIPTRYLNLVPFVALLDEAAEEFGFHPSGGLTLLCEIGFFEQILKLEETDEKRFGG  
VELNEFSKLVSEIRRDPCNETTTDRRGFTPLLKARV

>SA06G00887.t1 gene=SA06G00887 SaSAUR24

MAKGGGGAAAGKLTCLKSVMKKWQSFSSRLGCVPNAAAGAATSSISAGADDYDGAIS  
REDTENLRPVYVGKSRRRYLVSPDVVQHPLFQELVQRPSSSPPPSSGADAGITVACEVVL  
FDHLLWMLQIADSQSHHSDSLDELVHFYAC

>SA06G00889.t1 gene=SA06G00889 SaSAUR<sup>25</sup>

MDENGKGKVTGIRQIVRLKEILQKWQSVTLSSKGSQHPGGIAPVTNKQLKTPMCMCDS  
DDETQNPESPPDVPKGYLAVYVGPELRRFIPTGYLSHSLFKVLLEKVEEEFGFDHSGGL  
TIPCEIETFKYLLKCMENQQKAHPDEITAAGKSLSIAE

>SA07G00208.t1 gene=SA07G00208 SaSAUR26

MISLKKLIKLRKWHKVAAAKRKRISSTQTINGSTSDASTSSVASKGHFVAYSADGRRFV  
ISLLYLSNTIFKELFRMSEDEFGLPSEGPITFPCESVFLEYIISFIQGPAAKDLESALLLSLANS  
HHPSSRLCHEQTNEHLLLCAC

>SA07G00209.t1 gene=SA07G00209 SaSAUR27

MISLMKLFKFARKWHQVAAAKRKRISSPRTNGSMDVDNCTSSVASKDHFVLYSTGGGRF  
IIPLLHINNTIFRELFRMSDDEFGLPSEGPITFPCDSVFMEYIISFIQGPAAKDLEGALQLSLA  
NSHHPSSRLCHGQANEHLLLCAC

>SA07G00210.t1 gene=SA07G00210 SaSAUR28

MKISHRISSFESCRSWILNQSVRSEAVHDSLGVSQQCDFRVLFFEMAEFFGIPTDGQITLPC

NEAFLDDDQAGVVHSSGDEGGRMAA

>SA07G00277.t1 gene=SA07G00277 SaSAUR29

MVRGIGIPTMILNAKRALKHLHRSHELGDVPKGHVAVYVVGGEVEVRQMKRYVVP  
LNHPTFSGLLRRAEEEFGFDHPMGGLTIPCEEHTFLQLASRLTQSSSNMSLNIPP

>SA07G00278.t1 gene=SA07G00278 SaSAUR30

MGIGELAVEVVLHAKQAIQRRSSWRRQSRSPSNQAPTESEVPKGHFAIYVGVVEEEEEKRF  
VIPIAYLKHPMFQHLGLAEDEFGFDHRMGRLTIPCSEHEFLNRISRLD

>SA07G00279.t1 gene=SA07G00279 SaSAUR31

MGIRLNAKQILQRTL SMKNGTVSGDVPKGHIAVYVVGEGGKTRFVIPITYLNHPLFQNLLN  
VAEEEFGFNHPMGGLTLPCSEYFTSLTSLSS

>SA07G00280.t1 gene=SA07G00280 SaSAUR32

MGFLLPRTCHARRILRRVLSITRTIDVPKGHFVVYVGEACRKRFFVVPISYLNKHP  
SFKDLLAHAEFEFGFDHPTGGLTIPCKVEEFIDLTHSLSF

>SA07G00281.t1 gene=SA07G00281 SaSAUR33

MGLRLPSTFRAKQIFRRVLSAHTIQVPKGHFVVYVGEVCKKRFFVVPISYLNKHP  
SFQDLLTHAEKEFGFDHPMGGLTIPCRVEEFIDLTHSLSC

>SA07G00282.t1 gene=SA07G00282 SaSAUR34

MGLHLPTTFPAKQIFRRVLSSSRISVPKGHFVVYVGEVCKKRFFVVPISYLNKHP  
SFQDLLHAEEFEFGFDHPMGGLTVPFGEEDFIDLTHSLSC

>SA07G00283.t1 gene=SA07G00283 SaSAUR35

MGLRLPTKFPKGKQIFQRALSNHRTISVPAHFVVYVGRVCKKRFFVVPISYLNKHP  
SFQDLLHAKEKEFGYDHPMGGHTIPCRVEEFIDLTHSLSC

>SA07G00284.t1 gene=SA07G00284 SaSAUR36

MTSGSSIEENGPDHSSFLPKITSPKMVKSAEDDEKKGLYKRLKDVEVSVPVVYGNVAFWL  
GKKASEYQSHKWTVYVRGATNEDLGVIKRVIFQLHSSFNNPTRVVESEPPFELSECGWGE  
FEIAITLCFQSDVSDKPLNLYHHLKLYPEDESGPLSTKKPVVVESEYNEVVFSEPEAF  
LARVQSHPAVTMPRLPAGFSLPTHVPGEDANKKRGDTKDSSLSQWFTNFSEADELLKL  
ATARQQLAPDYIMFCTMSTGVSSDTRPKPWYMSLRKVFLYDHRVHVNKAGRLFLSSQ  
TLLLFQASGTHKTPSQTMAIRKSNKVLPQAAVLKQILKRCSSLGKKNGGGYGDDGLPLD  
VPKGHFVAVYVGENRIRHIVPISVLSHPEFQNLHRAEEFEFGFDHEMGLTIPCEETSFR  
SLTSMLLR

>SA08G01800.t1 gene=SA08G01800 SaSAUR37

MMGMNKKISFKKLAKKKVKGLAGDDNSRPSASEVLLQAADAGGEPLAKAASPLKRPR  
AGFLAVYVGDERRRFVVPTGFLAHPLFRILLEKASEEFGFEQRNGIVFPCSVSTFQEV  
MSAVECCNGNFDIGRLVEEIV

>SA08G01915.t1 gene=SA08G01915 SaSAUR38

MSMPTKNKEERKRALLRLKLFVGKLQRGTLTFSSPRMPDFSNADIEEELGHEERAVP  
DDVKEGQFAVFAVNCGEAKRFIIIEHLSPAFLELLEQAKEEYGFSGKALAVPCHPEEL  
KRLRDGRQKRE

>SA08G01928.t1 gene=SA08G01928 SaSAUR39

MRSKVSPSSVCDKFWQWTVWPSINEESFIPTDVPKGHLVVYVGDNCKRFVIKVTLLKHPL  
FRALLDKAQDEYDFTTDTKLCIPCDERIFLSVVRCAAGSRQG

>SA09G00119.t1 gene=SA09G00119 SaSAUR40

MKNREGRKRCFLWFGLFIGKLQRGLPLFSYSRLPSFSATDDMEEAMTVPLDVKKGHFAV  
FAVKGGETKRFVIELEHLTNPAFLSLELAKEEYGFSQKGVLAVPCRPEELRRILRDRMLF  
SQE

>SA09G00719.t1 gene=SA09G00719 SaSAUR41

MLIRPSMSRHGYRKLHGDGGEEAEAPVRVVVGKEKREFLVEPFVLEESPFRLMEAAAS  
ARPRKEDRRGRLGEEGERRAVFVDVDSILFEHMLWLMYNDCSSLFRNLNLEEIIDFYAHDF

>SA09G00803.t1 gene=SA09G00803 SaSAUR42

MNAALCSENQEKRIHSELAVASERMGKKASSMAYARKGDGARKHEHGRGDWQVRKKG  
YVPMVMGIEEEEEKKERVLIPIRFINHPFMAALLEISYPELGYCHHQGPLTIPCDPHCLRRV  
LRRILS

>SA10G00348.t1 gene=SA10G00348 SaSAUR43

MESKKSNKIRDIVRLQQILKKWKKLANASKSDNSNSNNNNNVGGCNKSINKFLKKTLSLS  
DLGSISGTNEAPPPKGF LAVCVGKELKRFVIPTEYLGHRAFHALLREAEFEFGFQQEGVL  
KIPCEVPVFENILEMVRDKREVFFFHREDFGIATNGSGTDCYCSDSLSERQMIPTKTDLSR  
NDPQEGRQVKAVLYRQVGHQLRQWTRGSIEAFRIGARSSIVQVTTEPRSAHTAGRRPKPY  
RVIVKQSNIESHA
